# Supplementary material
Source: PubMed Central journal article supplement (PMC1636565)

**A**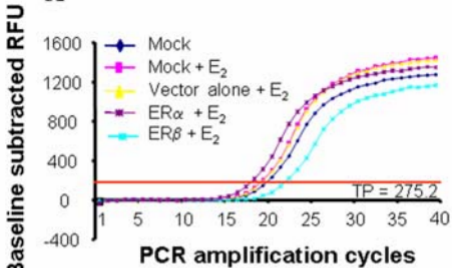**B**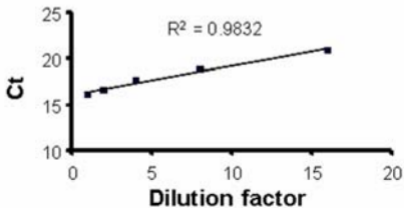

Supplement: pnas_0608128103_1.pdf [file pnas_0608128103_1.pdf]

**A**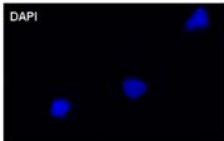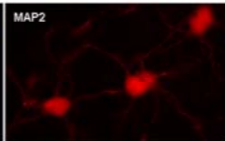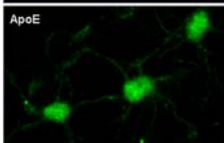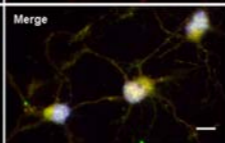**B**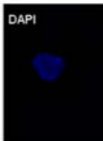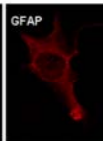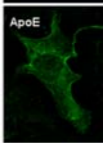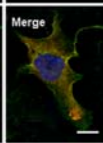

Supplement: pnas_0608128103_2.pdf [file pnas_0608128103_2.pdf]
